# Supplementary material for: Donor and newborn profiles and their influence on donation volume and duration: a cross-sectional study in a Spanish human milk bank
Source: PubMed Central journal article supplement — Int Breastfeed J. 2024 Aug 5;19:55. doi: 10.1186/s13006-024-00661-w (PMC11299286; doi:10.1186/s13006-024-00661-w), 2024-08-05
Supplement: 13006_2024_661_MOESM1_ESM.pdf [file 13006_2024_661_MOESM1_ESM.pdf]

# SUPPLEMENTAL MATERIAL 1

| <b>SURVEY 1</b>                |                                                                                                                       |
|--------------------------------|-----------------------------------------------------------------------------------------------------------------------|
| <b>AT HOSPITAL DISCHARGE</b>   |                                                                                                                       |
| ID: .....                      |                                                                                                                       |
| Survey date:    /    /2017     |                                                                                                                       |
| Birthdate of the newborn:..... |                                                                                                                       |
| Mother's name:..... Phone:     |                                                                                                                       |
| 1                              | Location housing, postal code =<br>1 = urban area; 2 = suburban area; 3 = rural area; 4 = outside Córdoba.            |
| 2                              | Mother's educational level (1= primary; 2= secondary; 3= professional training; 4= university or higher)              |
| 3                              | Do you work outside home (1=yes ; 2 =no)?                                                                             |
| 4                              | Will you be on maternity leave (1=yes; 2=no)?                                                                         |
| 5                              | Maternity leave (1= less than 16 weeks; 2= more than 16 weeks)                                                        |
| 6                              | Maternal age (years):                                                                                                 |
| 7                              | Weeks of gestation (weeks + days):                                                                                    |
| 8                              | Birth weight (grams):                                                                                                 |
| 9                              | Size at birth (cm):                                                                                                   |
| 10                             | Parity (1 = First; 2 = Second; 3 = More than 2)                                                                       |
| 11                             | Type of previous breastfeeding (1 = BF; 2 = LF; 3 = Mixed)                                                            |
| 12                             | Type of delivery (1 = Vaginal; 2 = Cesarean section)                                                                  |
| 13                             | Time elapsed from delivery to first feeding (1=less than 30 minutes; 2 = more than 30 minutes 3 = more than one hour) |
| 14                             | Have you attended childbirth preparation classes (1=health center; 2=private center; 3 = not prepared).               |
| 15                             | What decision have you made regarding the type of feeding you will provide for your child? (1=BF; 2=BF; 3 =Mixed)     |

|    |                                                                                                                                                                                                                            |
|----|----------------------------------------------------------------------------------------------------------------------------------------------------------------------------------------------------------------------------|
| 16 | Type of breastfeeding at Mother's discharge from Maternity.<br>1=BF; 2=FM, 3=Mixed                                                                                                                                         |
| 17 | Reason for FM? 1=Personal decision; 2=Incompatible with work; 3=Pathology                                                                                                                                                  |
| 18 | If breastfeeding, has your child been breastfed during the hospital stay (1=yes; 2=no)?                                                                                                                                    |
| 19 | If yes, how many feedings in total?                                                                                                                                                                                        |
| 20 | Would you be willing to donate breast milk? (1 = yes; 2 = no) (first reaction)                                                                                                                                             |
| 21 | If yes, the reason could be:<br>1 = Altruism; 2 = possible some left over; 3 = in case it will benefit me afterwards; 4 = other                                                                                            |
| 22 | If no, the reason could be:<br>1= Because I don't want to extract it; 2= because I think I will not have enough;<br>3 = Other (specify if possible):                                                                       |
| 23 | Would you be willing to donate breast milk? understanding that this involves expressing milk at home, freezing it, and then transporting it to the hospital in cold conditions every fifteen to twenty days (1=yes, 2=no). |
| 24 | Yes, but under any conditions?<br>1 = If I had a breast pump 2 = If picked up at home 3 = Other (write down)                                                                                                               |
| 25 | If no, the reason could be:<br>1= Does not have a breast pump; 2= It would be difficult to bring to the hospital; 3 = Other (note)                                                                                         |
| 26 | Is there a history of allergy to cow milk proteins in siblings or parents (1=yes; 2 = no)?                                                                                                                                 |
| 27 | Is there a history of atopic dermatitis in siblings and parents (1=yes; 2 = no)?                                                                                                                                           |
|    | Remarks:                                                                                                                                                                                                                   |

ID: ..... Date: .....

| <b>SURVEY 2</b>             |                                                                                                                                                                                                                           |
|-----------------------------|---------------------------------------------------------------------------------------------------------------------------------------------------------------------------------------------------------------------------|
| <b>ONE MONTH POSTPARTUM</b> |                                                                                                                                                                                                                           |
| 1                           | What type of breastfeeding do you currently do?<br>1=BF exclusively; 2 = FM exclusively; 3 = mixed                                                                                                                        |
| 2                           | If it is currently FM, until when did you breastfeed or mixed breastfeed (days)?                                                                                                                                          |
| 3                           | Reason for discontinuing breastfeeding:<br>1 = Believes insufficient milk production<br>2 = Breastfeeding difficulty<br>3 = Incompatibility with work<br>4 = Other (please specify if possible):                          |
| 4                           | During this first month of BF, has the child consumed any FM? 1=Yes; 2 =No,                                                                                                                                               |
| 5                           | Approximately how many intakes per day?                                                                                                                                                                                   |
| 6                           | For how many days?                                                                                                                                                                                                        |
| 7                           | Has the child developed any allergies (1=yes 2=no)?                                                                                                                                                                       |
| 8                           | 1 = allergy to cow milk proteins 2 = dermatitis 3 = other (specify)                                                                                                                                                       |
| 9                           | Would you be willing to donate breast milk? understanding that this involves expressing milk at home, freezing it, and then transporting it to the hospital in cold conditions every fifteen to twenty days (1=yes 2=no). |
| 10                          | If yes, the reason could be:<br>1 = Altruism; 2 = some left over; 3 = in case it will benefit me afterwards; 4 = other                                                                                                    |
| 11                          | Yes, but under any conditions?<br>1 = If I had a breast pump 2 = If picked up at home 3 = Other (write down)                                                                                                              |
| 12                          | How much do you think you would be able to donate?<br>1= Less than 20 cc/day<br>2 = 20-50 cc / day<br>3 = 50-70 cc / day<br>4 = 70-100 cc / day<br>5 = 100-150 cc / day<br>6 = Up to 200 cc/day                           |
| 13                          | How long do you think you will give BF exclusively?<br>1 = 2 more months<br>2 = 3 more months<br>3 = 4 more months<br>4 = 6 more months<br>5 = as much as possible                                                        |

| <b>SURVEY 3</b>               |                                                                                                                                                                                                                          |
|-------------------------------|--------------------------------------------------------------------------------------------------------------------------------------------------------------------------------------------------------------------------|
| <b>AT 4 MONTHS POSTPARTUM</b> |                                                                                                                                                                                                                          |
| 1                             | What type of breastfeeding do you currently do?<br>1=BF exclusively; 2 = FM exclusively; 3 = mixed                                                                                                                       |
| 2                             | If it is currently FM, until when did you breastfeed or mixed breastfeed (days)?                                                                                                                                         |
| 3                             | Reason for discontinuing breastfeeding:<br>1 = Believes insufficient milk production<br>2 = Breastfeeding difficulty<br>3 = Incompatibility with work<br>4 = Other (please specify if possible):                         |
| 4                             | During this first month of BF, has the child consumed any FM? 1=Yes; 2 =No,                                                                                                                                              |
| 5                             | Approximately how many intakes per day?                                                                                                                                                                                  |
| 6                             | For how many days?                                                                                                                                                                                                       |
| 7                             | Has the child developed any allergies (1=yes 2=no)?                                                                                                                                                                      |
| 8                             | 1 = allergy to cow milk proteins 2 = dermatitis 3 = other (specify)                                                                                                                                                      |
| 9                             | Would you be willing to donate breast milk? understanding that this entails expressing milk at home, freezing it, and then transporting it to the hospital in cold conditions every fifteen to twenty days (1=yes 2=no). |
| 10                            | If yes, the reason could be:<br>1 = Altruism; 2 = some left over; 3 = in case it will benefit me afterwards; 4 = other                                                                                                   |
| 11                            | Yes, but under any conditions?<br>1 = If I had a breast pump 2 = If picked up at home 3 = Other (write down)                                                                                                             |
| 12                            | How much do you think you would be able to donate?<br>1= Less than 20 cc/day<br>2 = 20-50 cc / day<br>3 = 50-70 cc / day<br>4 = 70-100 cc / day<br>5 = 100-150 cc / day<br>6 = Up to 200 cc/day                          |
| 13                            | How long do you think you will give BF exclusively?<br>1 = 2 more months<br>2 = 3 more months<br>3 = 4 more months<br>4 = 6 more months<br>5 = as much as possible                                                       |

**SURVEY 4 (by phone)**

**who indicated that they would be willing to donate breast milk**

**AT 9 MONTHS POSTPARTUM**

**ID: .....**

Survey date: / /2017

|    |                                                                                                                                                                                                                            |
|----|----------------------------------------------------------------------------------------------------------------------------------------------------------------------------------------------------------------------------|
| 1  | What type of breastfeeding do you currently have?<br>1=BF exclusively ; 2 = FM exclusively; 3 = mixed                                                                                                                      |
| 2  | If it is currently FM, until when did you breastfeed or mixed breastfeed (months)?                                                                                                                                         |
| 3  | Reason for discontinuing breastfeeding:<br>= Loss of milk supply; 2 = Baby's poor weight gain; 3 = Return to work, lack of time; 4 = Other reason                                                                          |
| 4  | Has the child developed any allergies (1=yes 2=no)?                                                                                                                                                                        |
| 5  | 1 = allergy to cow milk proteins 2 = dermatitis 3 = other (specify)                                                                                                                                                        |
| 6  | Now at 9 months post-partum, would you still be willing to donate breast milk (1=yes 2=no)?                                                                                                                                |
| 7  | Reason for yes,<br>1 = altruism 2 = left over 3 = Other reason                                                                                                                                                             |
| 8  | How much do you think you would be able to donate?<br>1= Less than 20 cc/day;<br>2 = 20-50 cc/day<br>3 = 50-70 cc/day<br>4 = 70-100 cc/day<br>5 = 100-150 cc/day<br>6 = Up to 200 cc/day<br>7 = Don't know, not expressing |
| 9  | Until when do you think you will give exclusive BF?<br>1 = Up to 10 to 12 months;<br>2 = from 13 to 18 months approx.<br>3 = from<br>18 to 24 months<br>4 = as long as I can<br>5 = Don't know                             |
| 10 | Surveyor's perception:<br><br>1 = the answers are sincere<br>2 = the answers are not very sincere<br>3 = Other: .....                                                                                                      |
